# Supplementary material for: Fossil evidence of the avian vocal organ from the Mesozoic
Source: Springer Nature journal article supplement (doi:10.1038/nature19852), 2016-10-01
Supplement: 41586_2016_BFnature19852_MOESM92_ESM.pdf [file 41586_2016_BFnature19852_MOESM92_ESM.pdf]

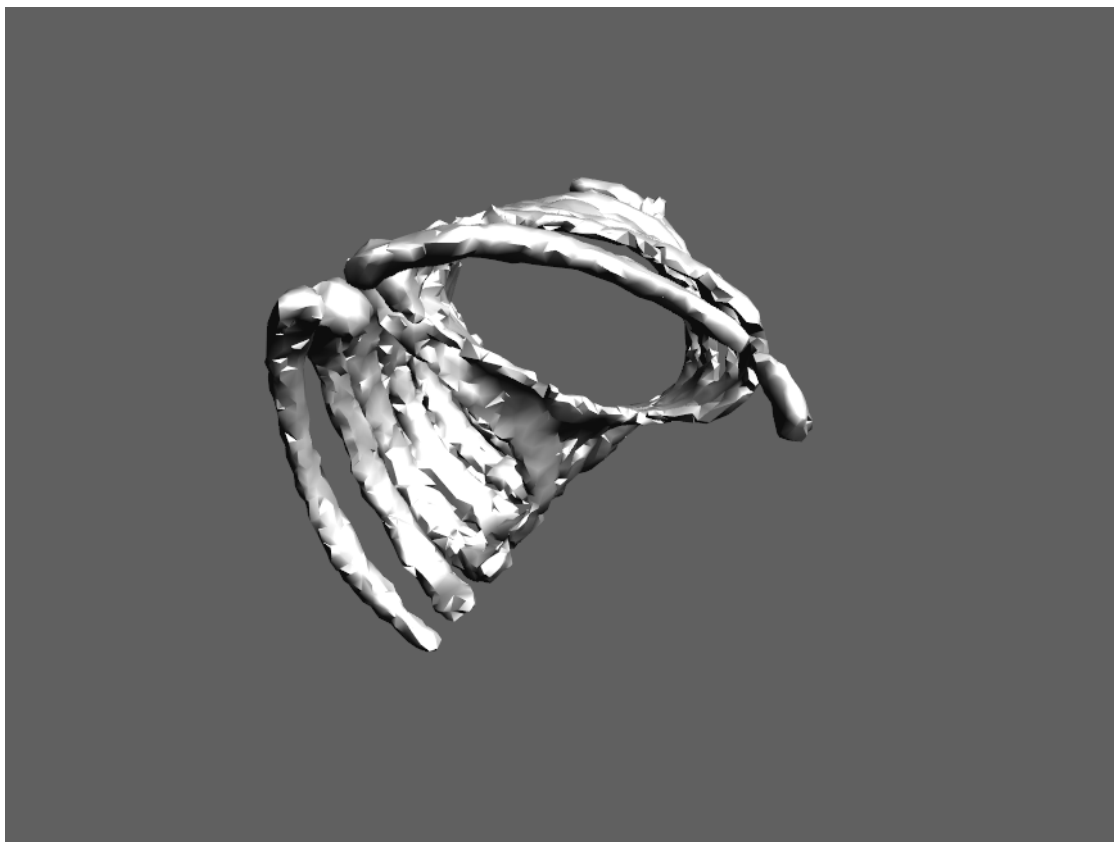

**Supplementary Figure 1.** 3D pdf of the reconstructed syrinx in *Vegavis iaai* (MACN-PV 19.748) from CT data.

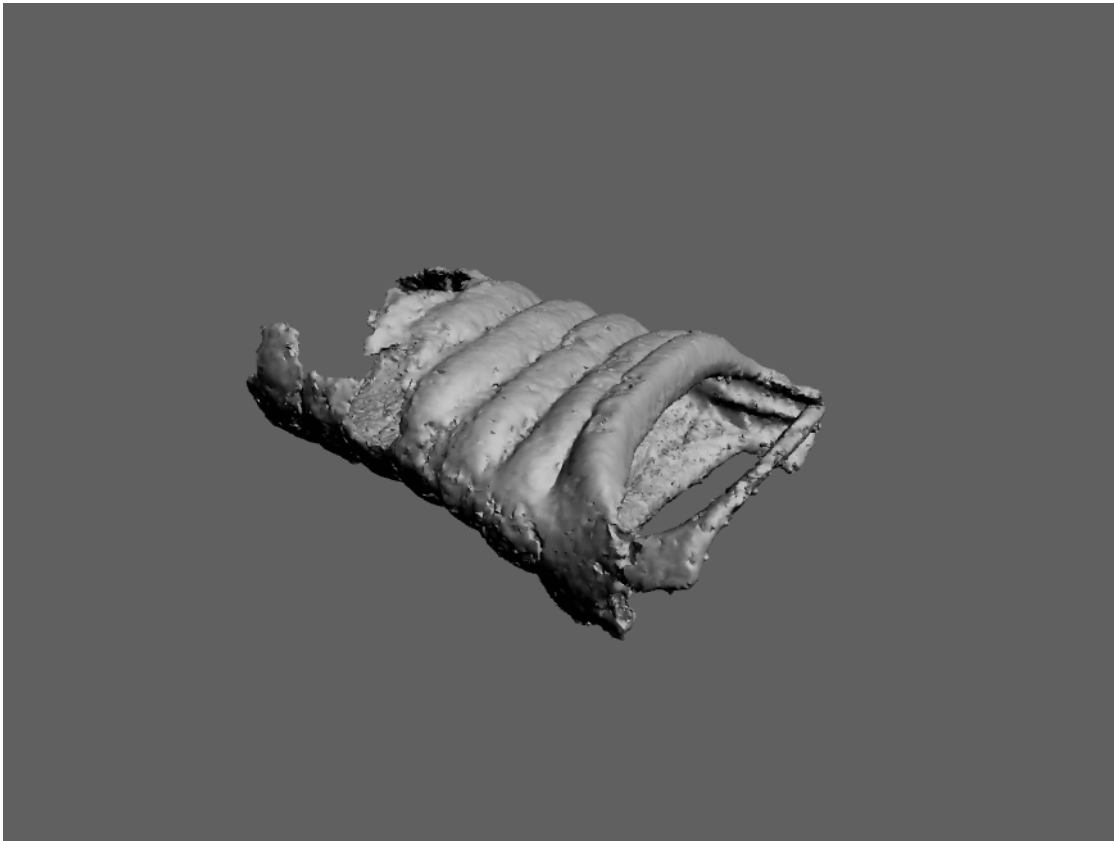

**Supplementary Figure 2.** 3D pdf of the syrinx in *Presbyornis* sp. (USNM PAL 617185) from CT data.
